# Supplementary material for: Liposome based drug delivery as a potential treatment option for Alzheimer's disease
Source: PubMed Central journal article supplement — Neural Regen Res. 2021 Nov 12;17(6):1190–8. doi: 10.4103/1673-5374.327328 (PMC8643057; doi:10.4103/1673-5374.327328), 2021-11-12
Supplement: NRR-17-1190_Suppl1.pdf [file NRR-17-1190_Suppl1.pdf]

## OPEN PEER REVIEW REPORT 1

**Name of journal:** Neural Regeneration Research

**Manuscript NO:** NRR-D-21-00303

**Title:** Liposome Based Drug Delivery as a Potential Treatment Option for Alzheimer's Disease

**Reviewer's Name:** Georg Petroianu

**Reviewer's country:** UNITED ARAB EMIRATES

### COMMENTS TO AUTHORS

The authors address a major problem associated with treatment of Alzheimer's Disease, i.e. the drug penetration through the BBB and the solution to the problem which they see in the use of various liposomal preparation. While the review is comprehensive it tends to focus on the advantages of liposomal preparation and ignore disadvantages. The loading by weight of liposomes is not mentioned or referenced.

Recent commentaries in the Journal highlighting the loading problem should be cited. The review would also benefit from additional figures.
