# Supplementary material for: Liposome based drug delivery as a potential treatment option for Alzheimer's disease
Source: PubMed Central journal article supplement — Neural Regen Res. 2021 Nov 12;17(6):1190–8. doi: 10.4103/1673-5374.327328 (PMC8643057; doi:10.4103/1673-5374.327328), 2021-11-12
Supplement: NRR-17-1190_Suppl2.pdf [file NRR-17-1190_Suppl2.pdf]

## OPEN PEER REVIEW REPORT 2

**Name of journal:** Neural Regeneration Research

**Manuscript NO:** NRR-D-21-00303

**Title:** Liposome Based Drug Delivery as a Potential Treatment Option for Alzheimer's Disease

**Reviewer's Name:** Lionel F Gamarra

**Reviewer's country:** Brazil

### COMMENTS TO AUTHORS

The manuscript entitled Liposome Based Drug Delivery as a Potential Treatment Option for Alzheimer's Disease by the authors C. Hernandez and S. Shukla is related to an interesting subject for the scientific community. But I would like to report some aspects after evaluation:

- Narrative reviews have a bias given that not all articles on the subject of interest are selected, but important and current articles in the literature were discussed in the manuscript. What needs to be done is to present the results found in the form of figures, graphs, etc. In this figure, the findings could be referenced and discussed in the final section of the article.

- In figure 1 it could be to improve the font size and to improve the information of the liposome technology.

The manuscript discussed virossomes, immunoliposomes and Gene-Bases Liposomes. It would be important to set up tables where studies could be compared, evaluation of effectiveness, among other parameters in group form for each technology covered.

- According to the information provided by the author of the databases, the SCOPUS database could be included where other studies, mainly studies carried out in humans, could be selected.
